# Supplementary material for: Study on the Coupling Law between Pore-Scale Fluid Flow Capacity and Pore-Throat Configuration in Tight Sandstone Reservoirs
Source: Hindawi journal article supplement (doi:10.1155/2023/1693773), 2023-04-11
Supplement: f1 [file 1693773.f1.docx]

**Table 1.** Experimental Data of Chang 6 Member from Constant-rate Mercury Injection

| Area | Well  Number | Pore  Mercury Injection Saturation  /% | Throat Mercury  Injection Saturation  /% | Effective Pore Volume  ml/cm3 | Effective Throat Volume  ml/cm3 | Average Throat Radius /μm | Average Pore Radius  /μm | Throat Amount per Unit Volume /cm3 | Pore Amount per Unit Volume /cm3 | Ratio of Pore and Throat Radius |
| --- | --- | --- | --- | --- | --- | --- | --- | --- | --- | --- |
|
|
|
| Heshui | Z115 | 31.14 | 24.77 | 0.09 | 0.06 | 0.31 | 136.62 | 2267.00 | 1364.00 | 442.14 |
| Z91(1) | 19.78 | 16.79 | 0.05 | 0.04 | 0.32 | 128.01 | 2122.00 | 1120.00 | 402.55 |
| Z91(2) | 20.90 | 17.56 | 0.07 | 0.06 | 0.25 | 133.01 | 1793.00 | 1292.00 | 525.73 |
| Z144 | 9.51 | 27.52 | 0.07 | 0.07 | 0.28 | 133.10 | 1949.00 | 1149.00 | 484.00 |
| X209 | 13.25 | 24.69 | 0.04 | 0.07 | 0.26 | 136.05 | 1947.00 | 1246.00 | 515.34 |
| Z117 | 44.62 | 20.08 | 0.13 | 0.06 | 0.69 | 132.39 | 1879.00 | 2865.00 | 191.87 |
| Average | 23.20 | 21.90 | 0.08 | 0.06 | 0.35 | 133.20 | 1992.83 | 1506.00 | 378.94 |
| Jiyuan | H3 | 46.12 | 27.06 | 0.15 | 0.09 | 0.89 | 130.94 | 2718.00 | 1718.00 | 147.79 |
| H133 | 24.27 | 29.10 | 0.07 | 0.08 | 0.43 | 135.28 | 2078.00 | 1176.00 | 316.07 |
| H179 | 30.75 | 26.83 | 0.10 | 0.09 | 0.57 | 129.79 | 1905.00 | 1902.00 | 226.11 |
| C269 | 27.04 | 25.84 | 0.09 | 0.09 | 0.58 | 127.74 | 2701.00 | 1607.00 | 219.48 |
| H196 | 41.00 | 24.81 | 0.12 | 0.07 | 0.69 | 129.58 | 3749.00 | 1342.00 | 188.62 |
| H192 | 34.64 | 22.36 | 0.10 | 0.07 | 0.64 | 129.20 | 1299.00 | 1096.00 | 203.46 |
| Z45 | 2.50 | 18.52 | 0.00 | 0.03 | 0.50 | 116.85 | 1278.00 | 1178.00 | 233.23 |
| Average | 29.47 | 24.93 | 0.09 | 0.07 | 0.61 | 128.48 | 2246.86 | 1431.29 | 209.50 |

**Table 2** the NMR Experiment Data Results

| Area | Well  Number | Moveable  Fluid  Saturation (%) | Moveable  Fluid  Porosity  (%) | Irreducible  Water  Saturation  (%) | Classification  Of Moveable  Fluid |
| --- | --- | --- | --- | --- | --- |
|
| Jiyuan | Z45 | 39.68 | 5.97 | 60.32 | Ⅲ |
| H3 | 43.30 | 5.11 | 56.70 | Ⅲ |
| H133 | 41.74 | 4.04 | 58.26 | Ⅲ |
| H179 | 48.41 | 6.56 | 51.59 | Ⅲ |
| C269 | 41.95 | 7.09 | 58.05 | Ⅲ |
| H196 | 45.92 | 5.92 | 54.08 | Ⅲ |
| H192 | 40.12 | 5.11 | 59.88 | Ⅲ |
| Average | 43.02 | 5.69 | 56.98 | / |
| Heshui | Z91(1) | 42.72 | 4.49 | 57.28 | Ⅲ |
| Z91(2) | 40.47 | 3.93 | 59.53 | Ⅲ |
| X209 | 37.03 | 3.18 | 62.97 | Ⅲ |
| Z144 | 33.95 | 3.46 | 66.05 | Ⅳ |
| Z117 | 29.89 | 4.54 | 70.11 | Ⅳ |
| Z115 | 27.77 | 2.69 | 72.23 | Ⅳ |
| Average | 35.31 | 3.72 | 64.69 | / |
